# Supplementary material for: Time-resolved photoluminescence spectroscopy for the detection of cysteine and other thiol containing amino acids in complex strongly autofluorescent media
Source: Royal Society of Chemistry journal article supplement (doi:10.1039/c2cc36588j), 2012-01-01
Supplement: c2cc36588j.pdf [file c2cc36588j.pdf]

# Time-resolved photoluminescence spectroscopy for the detection of cysteine and other thiol containing amino acids in complex strongly autofluorescent media

Kewei Huang<sup>a</sup> Ireneusz W. Bulik<sup>a</sup> Angel A. Martí<sup>a,b,c\*</sup>

<sup>a</sup> Department of Chemistry, <sup>b</sup> Department of Bioengineering, and <sup>c</sup> Rice Quantum Institute; Rice University, 6100 S. Main Street, Houston, TX 77005, USA.

## Supporting Information

### Table of contents

1. General instruments and spectroscopic methods
2. Synthesis procedures and characterization data
3. Supplementary spectra data
4. Cartesian Coordinates and Parameter for Gaussian Computations

### 1. General instruments, spectroscopic and computational methods

<sup>1</sup>H NMR spectra were recorded with a Bruker 400 MHz NMR spectrometer. Electrospray ionization mass spectra (ESI-MS) were measured on a Bruker MicroToF system.

UV-Visible spectra were recorded on a Shimadzu UV-2450 UV-Vis spectrophotometer. Steady-state photoluminescence spectra were obtained in a HORIBA JovinYvonFluorolog 3, with excitation at 370 nm. Time-resolved studies were performed using an Edinburgh Instruments OD470 single-photon counting spectrometer with a high speed red detector, and using a 370 nm picosecond pulse diode laser. Experiments in Dulbecco's Modified Eagle medium were performed using high glucose, pyruvate DMEM obtained from Invitrogen (cat. no. 11995).

Density Functional Theory calculations were performed with the aid of the Gaussian 09 (revision B.01) suite of programs,<sup>1</sup> employing the PBE0 functional,<sup>2</sup> with a 6-31G\* basis set for hydrogen, nitrogen, carbon and sulfur and the LANL2DZ pseudopotentials for Ir,<sup>3</sup> with an additional f-type function on the Ir atom with exponent  $\alpha = 0.938 \text{ bohr}^{-2}$  similar to Zhao et al.<sup>4</sup> A conductive polarizable continuum model with water as a solvent was used. Vibrational frequency analysis was used to confirm the potential energy surface minima.

## 2. Synthesis procedures and characterization data

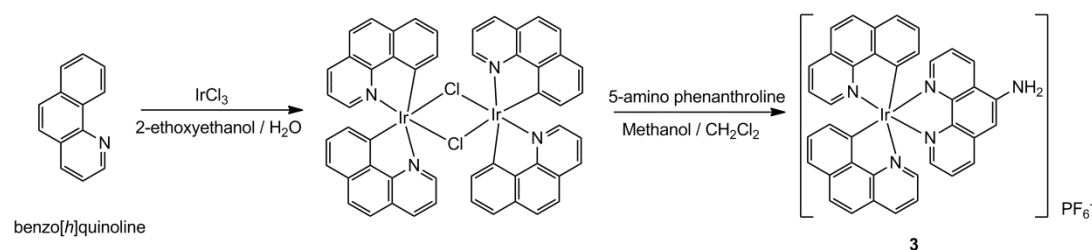

### Scheme S1. Synthesis of iridium complex **3**.

**Synthesis of complex 3:** This compound was synthesized based on literature methods.<sup>5</sup> A mixture of 2-ethoxyethanol and water (3:1, v/v) was added to a flask containing  $\text{IrCl}_3$  (0.30 g) and benzo[h]quinoline (0.34 g). The mixture was refluxed for 24 h. After cooling, the orange solid precipitate was filtered by vacuum to give crude cyclometalated iridium(III) chloro-bridged dimer. The solution of cyclometalated iridium(III) chloro-bridged dimer (0.1 g) and 5-amino phenanthroline (0.05 g) in  $\text{CH}_2\text{Cl}_2/\text{MeOH}$  [15 mL, 1:1 (v/v)] was heated to reflux. After 4 h, the orange solution was cooled to room temperature and then potassium hexafluorophosphate (0.08 g) was added. The suspension was stirred for another 15 minutes and filtered to remove insoluble inorganic salts. The solution was evaporated to dryness under reduced pressure and the crude product was purified by silica gel chromatography with an acetone and dichloromethane mixture (1:5, v/v) as eluent resulting in 80% yield.  $R_f$  for compound **3** is 0.38.  $^1\text{H NMR}$  (400 MHz,  $d_6$ -acetone)  $\delta$  (ppm) 8.975 (d,  $J = 8.4$ , 1H), 8.457 (d,  $J = 8.0$ , 2H), 8.355 (m, 2H), 8.124 (m, 2H), 7.960 (d,  $J = 4.8$ , 1H), 7.934 (d,  $J = 8.8$ , 2H), 7.840 (m, 3H), 7.587 (m, 1H), 7.508 (m, 2H), 7.439 (m, 2H), 7.311 (s, 1H), 7.163 (m, 2H), 6.463 (m, 2H), 6.394 (s, 2H). ESI-MS:  $m/e$  744.2 ( $\text{M} - \text{PF}_6^-$ ).

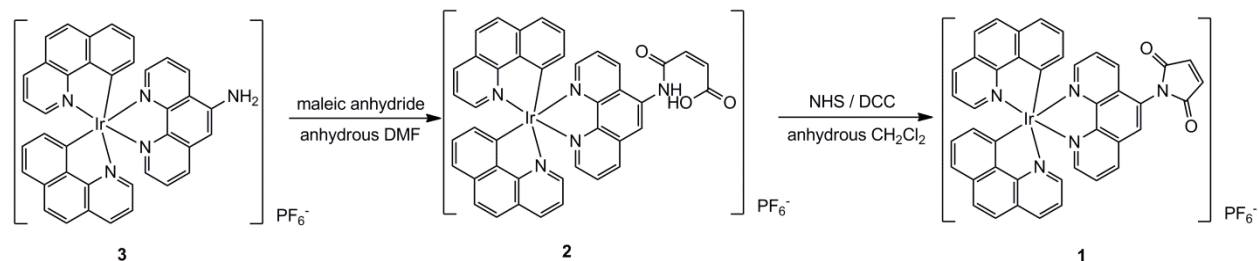

### Scheme S2. Synthesis of iridium complex **1**.

**Synthesis of complex 2:** A mixture of complex **3** (0.10 g) and maleic anhydride (0.20 g) was stirred in anhydrous DMF (5 mL) at 60 °C for 48 hours. The solution was evaporated to dryness under reduced pressure and the crude product was purified by silica gel chromatography with a methanol and dichloromethane mixture (1:19, v/v) as eluent resulting in 60% yield.  $R_f$  for compound **2** is 0.28.  $^1\text{H NMR}$  (400 MHz,  $\text{CD}_3\text{CN}$ ) 8.793 (d,  $J = 8.4$ , 1H), 8.565 (s, 1H), 8.544 (d,  $J = 8.4$ , 2H), 8.340 (m, 2H), 8.304 (d,  $J = 4.8$ , 1H), 8.205 (d,  $J = 4.8$ , 1H), 7.907 (d,  $J = 8.4$ ,

2H), 7.875 (m, 2H), 7.768 (d,  $J = 8.4$ , 2H), 7.233(m, 1H), 7.640 (m, 1H), 7.516 (d,  $J = 8.0$ , 2H), 7.301 (m, 2H), 7.171 (t,  $J = 7.2$ , 2H), 6.770 & 6.471 (both d, symmetric,  $J = 12.4$ , 1H & 1H), 6.391 (t,  $J = 7.2$ , 2H). ESI-MS:  $m/e$  842.2 (M – PF<sub>6</sub><sup>-</sup>).

**Synthesis of complex 1:** A mixture of complex 2 (50 mg), N,N'-Dicyclohexylcarbodiimide (40 mg) and N-Hydroxysuccinimide (25 mg) was dissolved in anhydrous dichloromethane (10 mL) and stirred at room temperature under nitrogen overnight. The solution was filtered to remove the white precipitate and filtrate was evaporated to dryness under reduced pressure. The crude product was purified by silica gel chromatography with an acetone and dichloromethane mixture (1:5, v/v) as eluent resulting in 90% yield. R<sub>f</sub> for compound **1** is 0.40. <sup>1</sup>H NMR (400 MHz, d<sub>6</sub>-DMSO)  $\delta$  (ppm) 8.918 (d,  $J = 8.4$ , 1H), 8.790 (d,  $J = 8.4$ , 1H), 8.536 (m, 3H), 8.236 (m, 2H), 7.966 (m, 8H), 7.594 (m, 2H), 7.486 (m, 2H), 7.432 (m, 2H), 7.236 (t,  $J = 7.2$ , 2H), 6.318 (t,  $J = 7.2$ , 2H). <sup>13</sup>C NMR (400 MHz, d<sub>6</sub>-acetone)  $\delta$  (ppm) 169.73, 157.15, 152.59, 152.38, 149.15, 147.98, 147.26, 146.43, 146.21, 140.91, 139.03, 137.57, 135.33, 135.27, 134.39, 130.48, 129.77, 129.49, 129.28, 129.12, 128.91, 127.40, 127.30, 127.06, 124.09, 122.43, 120.68. ESI-MS (high resolution):  $m/e$  824.1636 (M – PF<sub>6</sub><sup>-</sup>) (theoretical value: 824.16).

### 3. Supplementary spectra data

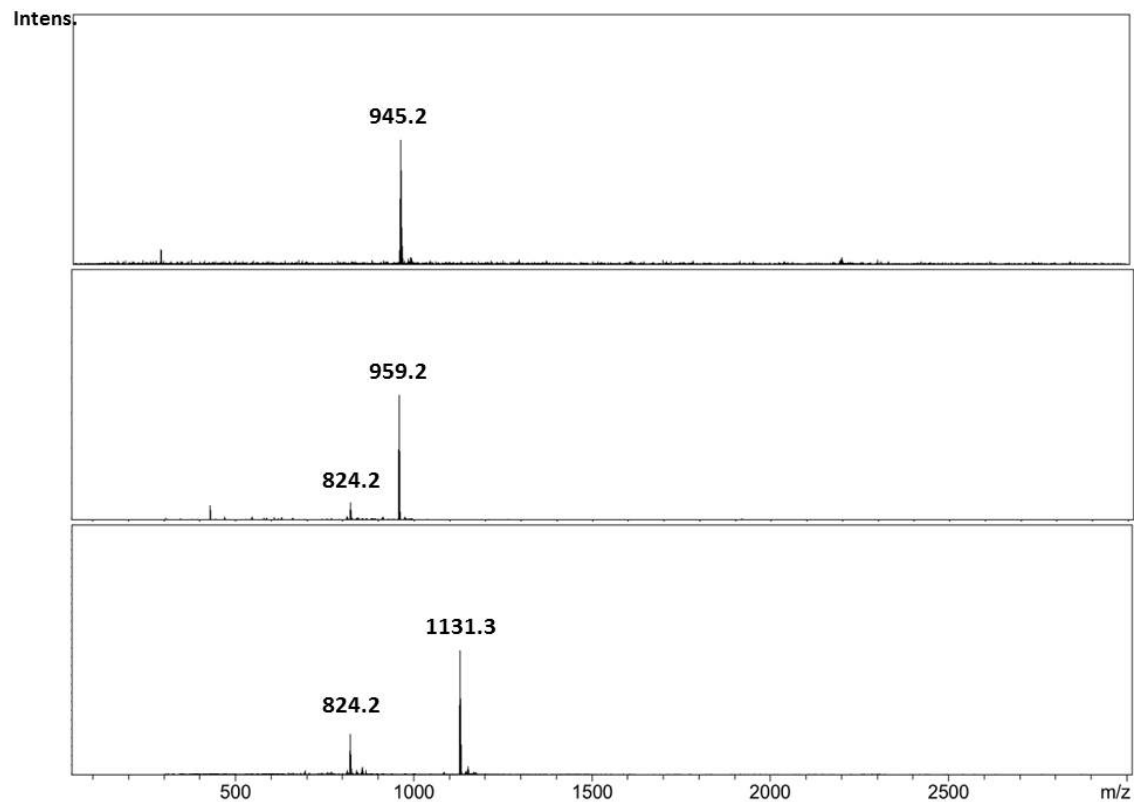

**Figure S1.** The ESI-Mass Spectrum of **1**-Cys, **1**-Hcy and **1**-GSH (from top to bottom).

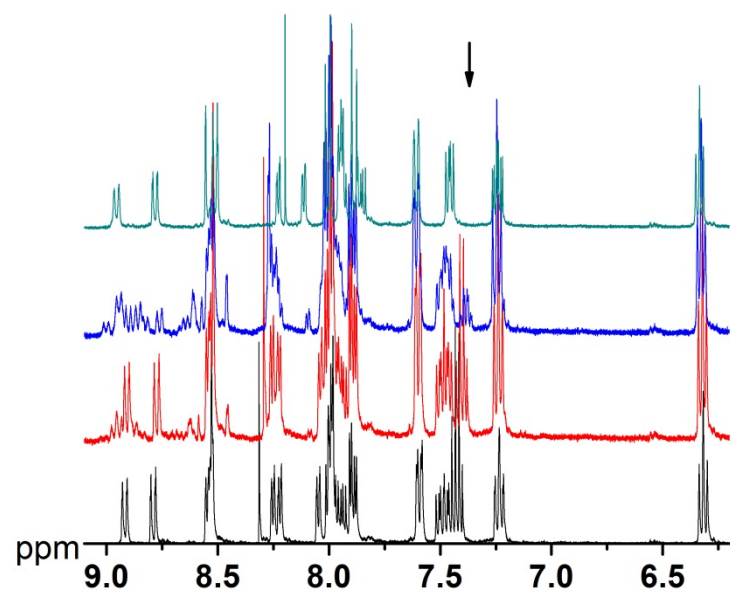

**Figure S2.** The <sup>1</sup>H NMR Spectra of 1.0 mM of **1** in d<sub>6</sub>-DMSO upon addition of cysteine in D<sub>2</sub>O (0, 0.33, 0.66 and 1.0 mM, from bottom to top). The quartet peak at 7.40 ppm disappeared

gradually after cysteine was added into the solution of **1**, which is attributed to the two protons of the maleimide.

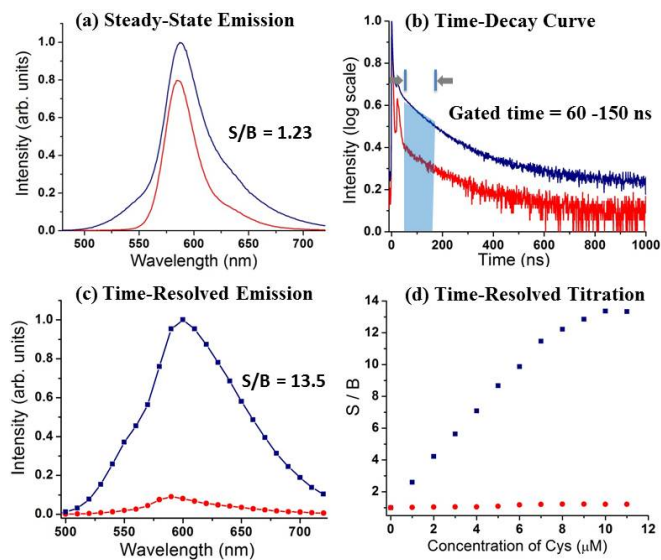

Figure S3. (a) Steady-state photoluminescence emission of 10  $\mu\text{M}$  solution of **1** (PBS 6.7 mM, pH 7.2, 1% DMF) in sulforhodamine autofluorescent media before (red line) and after (blue line) addition of 10  $\mu\text{M}$  cysteine; (b) Time-decay transients of the same solution before (red line) and after (blue line) addition of 10  $\mu\text{M}$  cysteine ( $\lambda_{\text{exc}} = 370 \text{ nm}$ ,  $\lambda_{\text{em}} = 590 \text{ nm}$ ); (c) Time-resolved emission spectra of the same solution time-gating from 60 to 150 ns after laser excitation; (d) Titration of cysteine to a solution of **1** in sulforhodamine autofluorescent media using a steady-state fluorometer (red points) and a time-resolved spectrometer with time-gating from 60 to 150 ns (blue points).

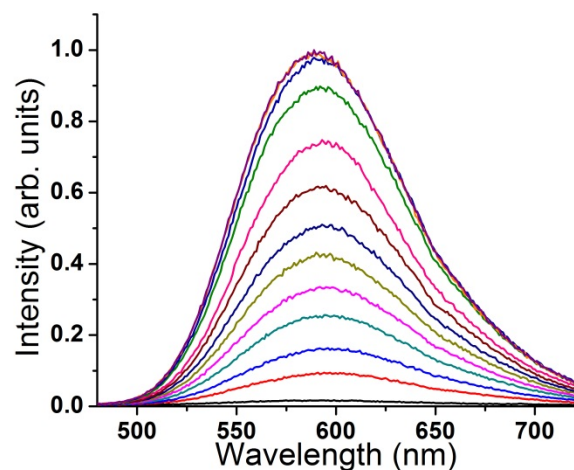

**Figure S4.** Fluorescence enhancement of **1** (10  $\mu\text{M}$ ) upon addition of homocysteine (0, 1, 2, 3, 4, 5, 6, 7, 8, 9, 10, 11  $\mu\text{M}$ ) in PBS buffer (6.7 mM, pH 7.2, 1% DMF).

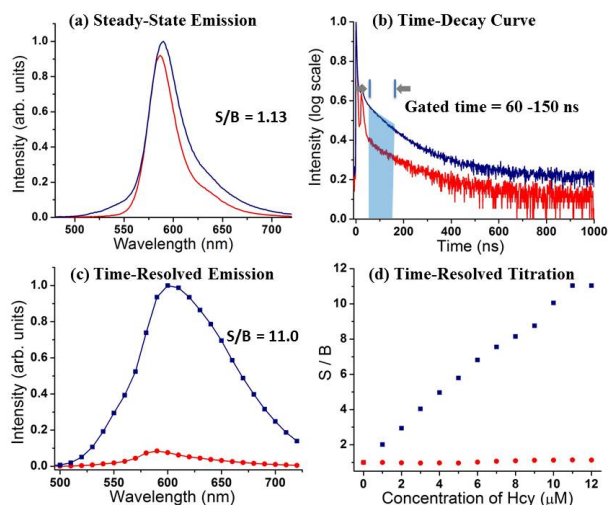

**Figure S5.** (a) Steady-state photoluminescence emission of 10  $\mu\text{M}$  solution of **1** (PBS 6.7 mM, pH 7.2, 1% DMF) in sulforhodamine autofluorescent media before (red line) and after (blue line) addition of 10  $\mu\text{M}$  homocysteine; (b) Time-decay transients of the same solution before (red line) and after (blue line) addition of 10  $\mu\text{M}$  homocysteine ( $\lambda_{\text{exc}} = 370 \text{ nm}$ ,  $\lambda_{\text{em}} = 590 \text{ nm}$ ); (c) Time-resolved emission spectra of the same solution time-gating from 60 to 150 ns after laser excitation; (d) Titration of homocysteine to a solution of **1** in sulforhodamine autofluorescent media using a steady-state fluorometer (red points) and a time-resolved spectrometer with time-gating from 60 to 150 ns (blue points).

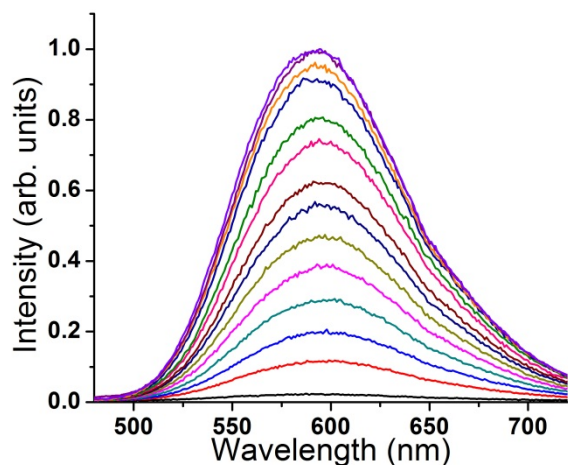

**Figure S6.** Fluorescence enhancement of **1** (10  $\mu\text{M}$ ) upon addition of glutathione (0, 1, 2, 3, 4, 5, 6, 7, 8, 9, 10, 11, 12  $\mu\text{M}$ ) in PBS buffer (6.7 mM, pH 7.2, 1% DMF).

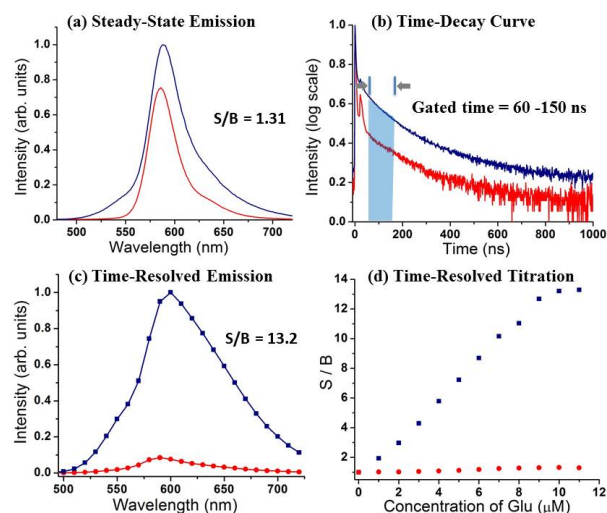

**Figure S7.** (a) Steady-state photoluminescence emission of 10  $\mu\text{M}$  solution of **1** (PBS 6.7 mM, pH 7.2, 1% DMF) in sulforhodamine autofluorescent media before (red line) and after (blue line) addition of 10  $\mu\text{M}$  glutathione; (b) Time-decay transients of the same solution before (red line) and after (blue line) addition of 10  $\mu\text{M}$  glutathione ( $\lambda_{\text{exc}} = 370 \text{ nm}$ , ( $\lambda_{\text{em}} = 590 \text{ nm}$ ); (c) Time-resolved emission spectra of the same solution time-gating from 60 to 150 ns after laser excitation; (d) Titration of glutathione to a solution of **1** in sulforhodamine autofluorescent media using a steady-state fluorometer (red points) and a time-resolved spectrometer with time-gating from 60 to 150 ns (blue points).

**Table S1.** Photoluminescence Properties of different species.

| Name                                      | Lifetime, ns ( $\lambda_{\text{em}} = 590 \text{ nm}$ ) <sup>a</sup> | Quantum Yield <sup>b</sup> |
|-------------------------------------------|----------------------------------------------------------------------|----------------------------|
| <b>1</b>                                  | —                                                                    | —                          |
| $[\text{Ir}(\text{bq})_2(\text{phen})]^+$ | 79.93 (62.37%)<br>213.51 (37.63%)                                    | 24.3%                      |
| <b>1</b> + Cys                            | 48.91 (61.45%)<br>179.39(38.55%)                                     | 11.1%                      |
| <b>1</b> + Hcy                            | 46.33 (58.38%)<br>188.94 (41.62%)                                    | 10.4%                      |
| <b>1</b> + GSH                            | 47.36 (64.00%)<br>193.99 (36.00%)                                    | 9.96%                      |

a. In DMF/PBS (1/99, v/v)

b. In DMF/PBS (1/99, v/v);  $\text{Ru}(\text{bpy})_3^{2+}$  in  $\text{H}_2\text{O}$  was used as reference<sup>6</sup>

**Table S2.** Detection Limit of **1** to different Thiol molecules.

| Name | Detection Limit (nM) <sup>a</sup> |
|------|-----------------------------------|
| Cys  | 16.4                              |
| Hcy  | 14.3                              |

|                              |      |
|------------------------------|------|
| GSH                          | 18.6 |
| a. In DMF/PBS (1/999, (v/v)) |      |

### Cartesian Coordinates and Parameter from Gaussian Computations

1

| Structural Data [Å] |        |           |           |           | Harmonic Frequencies |        |        |
|---------------------|--------|-----------|-----------|-----------|----------------------|--------|--------|
| Atom                | Symbol | X         | Y         | Z         |                      |        |        |
| 1                   | C      | 2.369621  | 1.610705  | -2.296088 | 14.07                | 25.28  | 28.65  |
| 2                   | C      | 3.494683  | 1.110690  | -1.651929 | 32.48                | 38.94  | 41.09  |
| 3                   | C      | 3.326053  | 0.271145  | -0.523642 | 44.13                | 54.58  | 68.41  |
| 4                   | C      | 1.996381  | 0.008115  | -0.091248 | 81.88                | 84.11  | 86.72  |
| 5                   | C      | 1.083897  | 1.282219  | -1.831386 | 126.05               | 139.78 | 154.95 |
| 6                   | C      | 4.412556  | -0.321278 | 0.230071  | 158.67               | 170.45 | 171.08 |
| 7                   | C      | 1.750948  | -0.776201 | 1.080104  | 181.28               | 183.64 | 194.23 |
| 8                   | C      | 2.837451  | -1.305209 | 1.827211  | 199.98               | 204.57 | 222.25 |
| 9                   | C      | 4.171816  | -1.067023 | 1.364303  | 225.72               | 228.78 | 249.46 |
| 10                  | C      | 2.526427  | -2.065085 | 2.983806  | 257.88               | 263.95 | 274.13 |
| 11                  | H      | 3.332521  | -2.492652 | 3.587003  | 277.92               | 286.79 | 291.40 |
| 12                  | C      | 1.193534  | -2.256359 | 3.329130  | 293.69               | 320.80 | 331.84 |
| 13                  | C      | 0.175219  | -1.693887 | 2.531958  | 335.51               | 342.08 | 423.19 |
| 14                  | H      | 2.464284  | 2.261966  | -3.167817 | 425.40               | 428.27 | 431.25 |
| 15                  | H      | 4.494239  | 1.371610  | -2.003511 | 433.92               | 436.99 | 451.49 |
| 16                  | H      | 0.181549  | 1.647302  | -2.324388 | 471.37               | 471.89 | 473.55 |
| 17                  | H      | 0.916633  | -2.837890 | 4.211445  | 487.37               | 493.34 | 497.81 |
| 18                  | H      | -0.880627 | -1.826916 | 2.780712  | 502.48               | 502.83 | 523.67 |
| 19                  | N      | 0.441443  | -0.966194 | 1.434622  | 532.69               | 534.16 | 547.96 |
| 20                  | N      | 0.890084  | 0.502547  | -0.749821 | 550.79               | 553.75 | 563.61 |
| 21                  | C      | -2.216043 | -2.520552 | -0.606030 | 564.55               | 566.37 | 585.09 |
| 22                  | C      | -0.245755 | -2.315043 | -1.964639 | 594.08               | 620.22 | 620.77 |
| 23                  | C      | -0.557010 | -3.568548 | -2.552066 | 625.59               | 635.23 | 640.00 |
| 24                  | C      | -1.685942 | -4.298786 | -2.178387 | 642.07               | 645.80 | 647.69 |
| 25                  | C      | -2.551666 | -3.782116 | -1.181415 | 674.93               | 710.68 | 711.67 |
| 26                  | C      | -3.057724 | -1.962703 | 0.398306  | 712.64               | 718.07 | 720.43 |
| 27                  | C      | -3.404873 | -0.155103 | 1.853743  | 728.35               | 739.80 | 741.31 |
| 28                  | C      | -4.577891 | -0.751525 | 2.352371  | 748.81               | 751.75 | 752.51 |
| 29                  | C      | -4.997665 | -1.984747 | 1.856907  | 769.95               | 770.19 | 773.05 |
| 30                  | C      | -4.232205 | -2.625051 | 0.852897  | 777.18               | 786.76 | 809.72 |
| 31                  | H      | 0.652464  | -1.789358 | -2.307013 | 812.12               | 823.59 | 824.74 |
| 32                  | H      | 0.109654  | -3.971797 | -3.322640 | 829.70               | 830.44 | 858.51 |
| 33                  | H      | -1.908171 | -5.264475 | -2.644468 | 866.13               | 867.20 | 877.50 |
| 34                  | H      | -3.052069 | 0.810073  | 2.221761  | 879.39               | 885.40 | 910.88 |
| 35                  | H      | -5.145108 | -0.229587 | 3.126610  | 912.81               | 916.11 | 916.75 |
| 36                  | H      | -5.909014 | -2.459008 | 2.234832  | 919.87               | 921.27 | 922.41 |
| 37                  | N      | -2.654871 | -0.744684 | 0.901683  | 932.13               | 940.20 | 941.30 |
| 38                  | C      | -2.262539 | 2.405891  | -0.833957 | 953.02               | 954.38 | 956.67 |



|    |    |           |           |           |         |         |         |
|----|----|-----------|-----------|-----------|---------|---------|---------|
| 39 | C  | -2.634807 | 0.662530  | -2.454214 | 958.50  | 960.25  | 966.76  |
| 40 | C  | -3.393804 | 1.573910  | -3.231258 | 1005.14 | 1007.06 | 1022.73 |
| 41 | C  | -3.589657 | 2.892438  | -2.824501 | 1025.43 | 1038.59 | 1058.69 |
| 42 | C  | -3.021269 | 3.340671  | -1.605482 | 1060.65 | 1065.86 | 1078.69 |
| 43 | C  | -1.679224 | 2.838475  | 0.400542  | 1082.54 | 1090.44 | 1096.13 |
| 44 | C  | -0.398655 | 2.237371  | 2.266924  | 1098.21 | 1103.79 | 1110.25 |
| 45 | C  | -0.500734 | 3.537001  | 2.799986  | 1126.19 | 1139.06 | 1139.81 |
| 46 | C  | -1.217750 | 4.507989  | 2.105311  | 1149.20 | 1150.67 | 1155.34 |
| 47 | C  | -1.831875 | 4.174809  | 0.873715  | 1186.53 | 1187.73 | 1192.67 |
| 48 | H  | -4.176967 | 3.587038  | -3.434399 | 1214.94 | 1216.29 | 1217.18 |
| 49 | H  | 0.151390  | 1.451467  | 2.791362  | 1229.20 | 1229.84 | 1238.57 |
| 50 | H  | -0.016031 | 3.762503  | 3.752898  | 1239.68 | 1244.61 | 1257.97 |
| 51 | H  | -1.312130 | 5.524360  | 2.501306  | 1294.48 | 1319.36 | 1323.14 |
| 52 | N  | -0.971522 | 1.892060  | 1.100756  | 1331.20 | 1334.04 | 1339.90 |
| 53 | H  | -3.834607 | 1.230633  | -4.173930 | 1341.82 | 1361.93 | 1362.52 |
| 54 | H  | -2.505773 | -0.361146 | -2.820524 | 1368.23 | 1372.54 | 1392.99 |
| 55 | C  | -2.046494 | 1.048867  | -1.240237 | 1399.34 | 1401.99 | 1413.00 |
| 56 | C  | -1.067500 | -1.754600 | -0.975420 | 1415.14 | 1421.17 | 1423.18 |
| 57 | Ir | -0.917239 | -0.025766 | 0.056450  | 1427.38 | 1429.43 | 1447.20 |
| 58 | N  | 5.749651  | -0.100455 | -0.189322 | 1456.83 | 1463.20 | 1490.58 |
| 59 | C  | 6.780624  | 0.423935  | 0.642615  | 1494.46 | 1495.54 | 1502.88 |
| 60 | C  | 6.302637  | -0.527399 | -1.427479 | 1504.28 | 1522.98 | 1566.40 |
| 61 | C  | 8.034852  | 0.367858  | -0.172469 | 1569.80 | 1576.32 | 1578.27 |
| 62 | C  | 7.759413  | -0.187549 | -1.367871 | 1579.14 | 1584.69 | 1594.92 |
| 63 | H  | 8.986431  | 0.734221  | 0.213556  | 1596.97 | 1600.42 | 1609.11 |
| 64 | H  | 8.430119  | -0.392928 | -2.202506 | 1619.45 | 1622.45 | 1625.15 |
| 65 | O  | 5.678131  | -1.064144 | -2.332953 | 1731.84 | 1785.85 | 3112.70 |
| 66 | O  | 6.629806  | 0.826359  | 1.787189  | 3113.37 | 3120.29 | 3121.13 |
| 67 | H  | 5.008176  | -1.498322 | 1.919726  | 3126.34 | 3126.87 | 3135.91 |
| 68 | C  | -2.598610 | 5.091332  | 0.072681  | 3136.08 | 3137.20 | 3138.74 |
| 69 | C  | -3.167917 | 4.686705  | -1.112587 | 3139.32 | 3140.27 | 3151.62 |
| 70 | C  | -3.743077 | -4.446753 | -0.716157 | 3154.47 | 3161.61 | 3162.21 |
| 71 | C  | -4.549082 | -3.896389 | 0.255627  | 3165.33 | 3168.36 | 3168.95 |
| 72 | H  | -3.749460 | 5.397739  | -1.709878 | 3176.16 | 3183.00 | 3184.15 |
| 73 | H  | -2.721106 | 6.119689  | 0.427735  | 3187.22 | 3198.32 | 3216.95 |
| 74 | H  | -5.449228 | -4.419947 | 0.593140  |         |         |         |
| 75 | H  | -4.004796 | -5.415749 | -1.155427 |         |         |         |

### 1-Cys

| Structural Data [Å] |        |           |           |           | Harmonic Frequencies |       |       |
|---------------------|--------|-----------|-----------|-----------|----------------------|-------|-------|
| Atom                | Symbol | X         | Y         | Z         |                      |       |       |
| 1                   | C      | 0.809494  | 1.597660  | -2.255770 | 8.61                 | 13.39 | 15.32 |
| 2                   | C      | 1.917775  | 1.038273  | -1.632146 | 24.73                | 26.79 | 29.22 |
| 3                   | C      | 1.721345  | 0.173852  | -0.527387 | 29.93                | 37.38 | 40.02 |
| 4                   | C      | 0.384718  | -0.056672 | -0.098661 | 44.16                | 46.06 | 54.47 |
| 5                   | C      | -0.485917 | 1.301755  | -1.795543 | 63.16                | 70.44 | 81.30 |

|    |   |           |           |           |         |         |         |
|----|---|-----------|-----------|-----------|---------|---------|---------|
| 6  | C | 2.784572  | -0.479978 | 0.204659  | 84.31   | 84.68   | 104.02  |
| 7  | C | 0.115443  | -0.873377 | 1.045462  | 113.60  | 121.91  | 148.63  |
| 8  | C | 1.183924  | -1.468098 | 1.768684  | 158.82  | 161.77  | 164.58  |
| 9  | C | 2.525575  | -1.256036 | 1.312140  | 171.54  | 176.22  | 181.91  |
| 10 | C | 0.850054  | -2.258116 | 2.898080  | 188.63  | 196.51  | 199.59  |
| 11 | H | 1.642425  | -2.735268 | 3.481881  | 203.94  | 223.63  | 225.83  |
| 12 | C | -0.487934 | -2.414744 | 3.241444  | 229.04  | 248.12  | 254.11  |
| 13 | C | -1.487560 | -1.788483 | 2.468594  | 259.09  | 263.22  | 274.58  |
| 14 | H | 0.924462  | 2.269507  | -3.109227 | 279.79  | 287.28  | 292.06  |
| 15 | H | 2.925480  | 1.269445  | -1.981782 | 298.40  | 309.24  | 321.30  |
| 16 | H | -1.375761 | 1.712866  | -2.274818 | 330.42  | 332.59  | 335.72  |
| 17 | H | -0.783174 | -3.017750 | 4.103110  | 347.35  | 391.80  | 425.71  |
| 18 | H | -2.546769 | -1.894629 | 2.716024  | 426.25  | 428.97  | 433.60  |
| 19 | N | -1.199169 | -1.031306 | 1.397194  | 436.59  | 440.04  | 451.95  |
| 20 | N | -0.705081 | 0.495370  | -0.738589 | 470.92  | 472.16  | 474.22  |
| 21 | C | -3.882211 | -2.449441 | -0.689051 | 487.55  | 489.29  | 492.40  |
| 22 | C | -1.903971 | -2.251334 | -2.037341 | 495.27  | 499.14  | 502.89  |
| 23 | C | -2.240496 | -3.482076 | -2.658005 | 508.33  | 524.29  | 532.96  |
| 24 | C | -3.385931 | -4.197190 | -2.306105 | 534.49  | 548.35  | 550.80  |
| 25 | C | -4.243315 | -3.687921 | -1.298219 | 553.96  | 556.15  | 564.18  |
| 26 | C | -4.714897 | -1.899970 | 0.327416  | 565.45  | 571.32  | 577.91  |
| 27 | C | -5.028801 | -0.123094 | 1.827656  | 586.66  | 620.67  | 625.03  |
| 28 | C | -6.217963 | -0.704990 | 2.304636  | 626.43  | 628.89  | 634.07  |
| 29 | C | -6.662391 | -1.915626 | 1.776059  | 640.53  | 641.15  | 644.89  |
| 30 | C | -5.906118 | -2.547248 | 0.759686  | 648.32  | 701.77  | 710.84  |
| 31 | H | -0.993053 | -1.737383 | -2.363751 | 711.28  | 711.88  | 718.09  |
| 32 | H | -1.580348 | -3.879513 | -3.437145 | 721.16  | 724.33  | 728.77  |
| 33 | H | -3.627594 | -5.145407 | -2.797676 | 740.36  | 744.33  | 748.82  |
| 34 | H | -4.656571 | 0.824024  | 2.222630  | 752.35  | 752.91  | 756.90  |
| 35 | H | -6.777742 | -0.189998 | 3.088874  | 770.45  | 774.04  | 776.88  |
| 36 | H | -7.586184 | -2.378655 | 2.137340  | 778.26  | 789.03  | 811.91  |
| 37 | N | -4.286941 | -0.705189 | 0.864627  | 823.87  | 824.93  | 829.61  |
| 38 | C | -3.794165 | 2.491662  | -0.768900 | 830.52  | 834.49  | 858.57  |
| 39 | C | -4.208463 | 0.814449  | -2.447802 | 865.55  | 869.00  | 872.24  |
| 40 | C | -4.931395 | 1.774584  | -3.200255 | 879.39  | 885.67  | 886.67  |
| 41 | C | -5.087853 | 3.085034  | -2.752454 | 911.28  | 912.93  | 913.57  |
| 42 | C | -4.516118 | 3.474763  | -1.515079 | 917.23  | 917.78  | 920.71  |
| 43 | C | -3.209033 | 2.864997  | 0.484039  | 923.40  | 935.50  | 939.12  |
| 44 | C | -1.964900 | 2.163371  | 2.339919  | 941.03  | 941.30  | 953.34  |
| 45 | C | -2.035378 | 3.446208  | 2.916780  | 955.22  | 956.90  | 958.66  |
| 46 | C | -2.716083 | 4.461220  | 2.249110  | 958.83  | 960.84  | 967.26  |
| 47 | C | -3.326406 | 4.188675  | 1.000877  | 1005.42 | 1007.22 | 1015.72 |
| 48 | H | -5.647069 | 3.817819  | -3.343791 | 1025.36 | 1047.85 | 1058.00 |
| 49 | H | -1.441264 | 1.345131  | 2.841432  | 1059.34 | 1061.88 | 1072.18 |
| 50 | H | -1.554359 | 3.624582  | 3.881481  | 1080.06 | 1083.16 | 1091.73 |
| 51 | H | -2.784630 | 5.465782  | 2.679141  | 1095.97 | 1099.17 | 1105.13 |
| 52 | N | -2.536129 | 1.874934  | 1.157478  | 1117.86 | 1129.50 | 1136.52 |
| 53 | H | -5.375159 | 1.476162  | -4.156674 | 1139.29 | 1139.88 | 1149.03 |
| 54 | H | -4.109620 | -0.200232 | -2.847138 | 1149.78 | 1150.77 | 1153.60 |

|    |    |           |           |           |         |         |         |
|----|----|-----------|-----------|-----------|---------|---------|---------|
| 55 | C  | -3.617471 | 1.142215  | -1.217995 | 1163.58 | 1182.98 | 1185.88 |
| 56 | C  | -2.716220 | -1.699252 | -1.035630 | 1188.03 | 1192.32 | 1213.99 |
| 57 | Ir | -2.527503 | -0.006098 | 0.047842  | 1216.01 | 1217.25 | 1229.57 |
| 58 | N  | 4.133974  | -0.296121 | -0.217114 | 1229.99 | 1234.35 | 1239.29 |
| 59 | C  | 5.135566  | 0.259075  | 0.614989  | 1239.63 | 1240.91 | 1248.19 |
| 60 | C  | 4.637616  | -0.768308 | -1.456707 | 1258.40 | 1262.89 | 1274.73 |
| 61 | C  | 6.425915  | 0.322721  | -0.208269 | 1304.71 | 1319.54 | 1323.02 |
| 62 | C  | 6.137149  | -0.514481 | -1.466057 | 1328.31 | 1334.18 | 1337.49 |
| 63 | H  | 6.642940  | -1.495601 | -1.431622 | 1340.58 | 1341.65 | 1349.72 |
| 64 | O  | 3.953404  | -1.299492 | -2.317480 | 1361.65 | 1368.54 | 1372.40 |
| 65 | O  | 4.961575  | 0.621329  | 1.767610  | 1375.98 | 1392.17 | 1399.51 |
| 66 | H  | 3.349707  | -1.731002 | 1.850034  | 1402.11 | 1414.35 | 1415.13 |
| 67 | C  | -4.056044 | 5.154827  | 0.224110  | 1419.58 | 1421.19 | 1423.95 |
| 68 | C  | -4.625350 | 4.807891  | -0.979273 | 1427.43 | 1429.20 | 1447.79 |
| 69 | C  | -5.450482 | -4.338361 | -0.854007 | 1453.38 | 1456.72 | 1462.39 |
| 70 | C  | -6.248276 | -3.795576 | 0.128801  | 1491.21 | 1494.71 | 1495.79 |
| 71 | H  | -5.178526 | 5.556155  | -1.557684 | 1503.28 | 1504.37 | 1523.14 |
| 72 | H  | -4.150026 | 6.174145  | 0.612302  | 1566.73 | 1569.80 | 1576.38 |
| 73 | H  | -7.160982 | -4.307680 | 0.449724  | 1578.51 | 1579.20 | 1584.79 |
| 74 | H  | -5.731432 | -5.289750 | -1.319117 | 1594.88 | 1597.52 | 1601.01 |
| 75 | H  | 6.582880  | 1.384882  | -0.472351 | 1619.79 | 1622.42 | 1626.49 |
| 76 | H  | 6.430270  | -0.021185 | -2.405681 | 1646.07 | 1741.31 | 1754.34 |
| 77 | S  | 7.832976  | -0.219534 | 0.849966  | 1803.88 | 2985.81 | 2999.58 |
| 78 | C  | 9.195860  | 0.121741  | -0.337891 | 3004.88 | 3018.77 | 3073.60 |
| 79 | H  | 9.261949  | -0.694720 | -1.078739 | 3079.01 | 3112.50 | 3113.16 |
| 80 | H  | 8.997572  | 1.063399  | -0.873528 | 3120.77 | 3121.31 | 3125.82 |
| 81 | C  | 10.510847 | 0.244824  | 0.449281  | 3127.07 | 3135.73 | 3135.94 |
| 82 | H  | 10.425966 | 1.132652  | 1.105221  | 3137.64 | 3139.43 | 3139.94 |
| 83 | C  | 11.635901 | 0.585901  | -0.548702 | 3140.36 | 3152.90 | 3153.72 |
| 84 | N  | 10.700761 | -0.919050 | 1.310865  | 3162.53 | 3163.64 | 3165.87 |
| 85 | H  | 10.880286 | -1.749041 | 0.732003  | 3168.18 | 3169.07 | 3177.07 |
| 86 | H  | 11.544919 | -0.790231 | 1.879925  | 3181.54 | 3186.96 | 3187.30 |
| 87 | O  | 11.559623 | 1.467428  | -1.396108 | 3394.00 | 3480.71 | 3547.22 |
| 88 | O  | 12.734073 | -0.188562 | -0.370255 |         |         |         |
| 89 | H  | 13.396546 | 0.115534  | -1.036106 |         |         |         |

**[Ir(bq)<sub>2</sub>(phen)]<sup>+</sup>**

| Structural Data [Å] |        |           |           |           | Harmonic Frequencies |        |        |
|---------------------|--------|-----------|-----------|-----------|----------------------|--------|--------|
| Atom                | Symbol | X         | Y         | Z         |                      |        |        |
| 1                   | C      | -3.051647 | 1.242143  | 2.845909  | 25.42                | 27.92  | 37.15  |
| 2                   | C      | -4.192814 | 0.604351  | 2.373539  | 40.76                | 42.94  | 43.75  |
| 3                   | C      | -4.097410 | -0.212640 | 1.219725  | 81.60                | 82.14  | 84.28  |
| 4                   | C      | -2.822203 | -0.334088 | 0.601961  | 152.88               | 162.46 | 165.34 |
| 5                   | C      | -1.821911 | 1.071966  | 2.182055  | 171.06               | 175.69 | 182.84 |
| 6                   | C      | -5.210280 | -0.920541 | 0.645359  | 190.99               | 201.31 | 203.62 |
| 7                   | C      | -2.663515 | -1.146443 | -0.564945 | 223.52               | 224.16 | 228.47 |

|    |   |           |           |           |         |         |         |
|----|---|-----------|-----------|-----------|---------|---------|---------|
| 8  | C | -3.778556 | -1.836840 | -1.116490 | 247.16  | 256.67  | 265.63  |
| 9  | C | -5.058327 | -1.700774 | -0.475745 | 283.11  | 286.28  | 291.78  |
| 10 | C | -3.547725 | -2.620662 | -2.275265 | 321.37  | 322.52  | 335.71  |
| 11 | H | -4.375923 | -3.167947 | -2.735044 | 424.16  | 425.80  | 428.35  |
| 12 | C | -2.265910 | -2.681430 | -2.810728 | 429.20  | 434.48  | 436.30  |
| 13 | C | -1.215915 | -1.966449 | -2.198416 | 457.53  | 470.29  | 471.31  |
| 14 | H | -3.085668 | 1.879710  | 3.732317  | 487.26  | 487.40  | 489.95  |
| 15 | H | -5.156221 | 0.724432  | 2.877635  | 497.38  | 502.91  | 506.11  |
| 16 | H | -0.906810 | 1.552323  | 2.532123  | 523.01  | 524.47  | 532.57  |
| 17 | H | -2.053405 | -3.278058 | -3.700883 | 548.20  | 550.13  | 552.29  |
| 18 | H | -0.198435 | -2.000236 | -2.595909 | 554.49  | 563.33  | 564.71  |
| 19 | N | -1.404517 | -1.210746 | -1.103824 | 612.63  | 620.09  | 624.98  |
| 20 | N | -1.697981 | 0.303072  | 1.081896  | 636.89  | 640.82  | 647.64  |
| 21 | C | 1.728742  | -2.298221 | 0.541186  | 710.79  | 711.40  | 711.94  |
| 22 | C | -0.008786 | -2.268029 | 2.199604  | 716.27  | 717.27  | 720.73  |
| 23 | C | 0.561847  | -3.432560 | 2.775057  | 729.68  | 740.32  | 749.59  |
| 24 | C | 1.706053  | -4.031755 | 2.247206  | 750.91  | 753.44  | 760.63  |
| 25 | C | 2.322052  | -3.468776 | 1.100946  | 769.76  | 774.29  | 781.88  |
| 26 | C | 2.317768  | -1.696158 | -0.607947 | 821.10  | 823.01  | 824.44  |
| 27 | C | 2.184446  | 0.056604  | -2.163167 | 828.63  | 830.55  | 835.54  |
| 28 | C | 3.336315  | -0.410397 | -2.823291 | 858.50  | 864.06  | 870.40  |
| 29 | C | 3.992527  | -1.549082 | -2.358980 | 876.69  | 887.06  | 905.65  |
| 30 | C | 3.486884  | -2.225568 | -1.222436 | 911.76  | 913.22  | 915.87  |
| 31 | H | -0.904005 | -1.843242 | 2.667025  | 921.84  | 922.57  | 925.93  |
| 32 | H | 0.088730  | -3.871571 | 3.660677  | 939.39  | 941.69  | 952.13  |
| 33 | H | 2.131003  | -4.929807 | 2.707782  | 953.44  | 955.36  | 955.64  |
| 34 | H | 1.650863  | 0.947548  | -2.500591 | 959.33  | 966.04  | 969.52  |
| 35 | H | 3.700361  | 0.136919  | -3.695950 | 1005.20 | 1006.43 | 1024.98 |
| 36 | H | 4.890391  | -1.922054 | -2.861979 | 1058.39 | 1059.25 | 1064.71 |
| 37 | N | 1.678805  | -0.571077 | -1.083008 | 1078.68 | 1082.01 | 1091.86 |
| 38 | C | 1.141743  | 2.596334  | 0.574730  | 1098.04 | 1098.81 | 1108.56 |
| 39 | C | 1.989720  | 1.014808  | 2.182225  | 1139.07 | 1140.19 | 1140.51 |
| 40 | C | 2.728823  | 2.060271  | 2.791296  | 1149.36 | 1149.58 | 1150.79 |
| 41 | C | 2.680979  | 3.365966  | 2.306086  | 1187.37 | 1191.18 | 1207.08 |
| 42 | C | 1.878694  | 3.663976  | 1.175654  | 1215.30 | 1217.15 | 1225.01 |
| 43 | C | 0.322160  | 2.876616  | -0.566354 | 1229.49 | 1231.73 | 1233.68 |
| 44 | C | -1.143444 | 2.008879  | -2.173066 | 1239.56 | 1240.22 | 1253.27 |
| 45 | C | -1.297691 | 3.276040  | -2.768480 | 1319.92 | 1323.24 | 1335.64 |
| 46 | C | -0.616118 | 4.369045  | -2.239229 | 1340.51 | 1342.87 | 1347.19 |
| 47 | C | 0.221351  | 4.190038  | -1.111574 | 1361.66 | 1369.06 | 1374.03 |
| 48 | H | 3.256327  | 4.164583  | 2.786205  | 1399.88 | 1401.80 | 1410.36 |
| 49 | H | -1.661463 | 1.130575  | -2.567018 | 1413.36 | 1415.93 | 1423.18 |
| 50 | H | -1.950666 | 3.381271  | -3.638180 | 1426.79 | 1428.29 | 1430.13 |
| 51 | H | -0.719851 | 5.363270  | -2.685954 | 1447.10 | 1457.52 | 1457.79 |
| 52 | N | -0.354766 | 1.808893  | -1.103079 | 1494.06 | 1495.38 | 1498.41 |
| 53 | H | 3.351822  | 1.833290  | 3.663780  | 1503.21 | 1504.54 | 1520.70 |
| 54 | H | 2.058524  | 0.005954  | 2.602801  | 1566.39 | 1569.89 | 1576.54 |
| 55 | C | 1.174125  | 1.250398  | 1.064323  | 1578.32 | 1579.34 | 1585.23 |
| 56 | C | 0.559207  | -1.666050 | 1.066508  | 1595.38 | 1597.33 | 1601.39 |

|    |    |           |           |           |         |         |         |
|----|----|-----------|-----------|-----------|---------|---------|---------|
| 57 | Ir | 0.014635  | -0.034751 | 0.009733  | 1619.83 | 1623.31 | 1630.32 |
| 58 | H  | -5.914084 | -2.234130 | -0.900286 | 3108.65 | 3113.23 | 3120.34 |
| 59 | C  | 0.976396  | 5.241590  | -0.484201 | 3120.87 | 3122.01 | 3126.89 |
| 60 | C  | 1.770105  | 4.984358  | 0.609345  | 3134.77 | 3136.06 | 3137.41 |
| 61 | C  | 3.505262  | -3.999498 | 0.472113  | 3139.30 | 3140.21 | 3140.82 |
| 62 | C  | 4.064672  | -3.407843 | -0.638542 | 3141.11 | 3150.75 | 3150.87 |
| 63 | H  | 2.339283  | 5.797042  | 1.074227  | 3154.24 | 3155.22 | 3160.96 |
| 64 | H  | 0.900308  | 6.254859  | -0.891613 | 3162.00 | 3169.15 | 3170.39 |
| 65 | H  | 4.960842  | -3.832939 | -1.101590 | 3173.01 | 3174.99 | 3184.15 |
| 66 | H  | 3.963506  | -4.899691 | 0.896304  |         |         |         |
| 67 | H  | -6.188824 | -0.824740 | 1.124918  |         |         |         |

## References

- 1 M. J. Frisch, G. W. Trucks, H. B. Schlegel, G. E. Scuseria, M. A. Robb, J. R. Cheeseman, G. Scalmani, V. Barone, B. Mennucci, G. A. Petersson, H. Nakatsuji, M. Caricato, X. Li, H. P. Hratchian, A. F. Izmaylov, J. Bloino, G. Zheng, J. L. Sonnenberg, M. Hada, M. Ehara, K. Toyota, R. Fukuda, J. Hasegawa, M. Ishida, T. Nakajima, Y. Honda, O. Kitao, H. Nakai, T. Vreven, J. A. Montgomery, Jr., J. E. Peralta, F. Ogliaro, M. Bearpark, J. J. Heyd, E. Brothers, K. N. Kudin, V. N. Staroverov, T. Keith, R. Kobayashi, J. Normand, K. Raghavachari, A. Rendell, J. C. Burant, S. S. Iyengar, J. Tomasi, M. Cossi, N. Rega, J. M. Millam, M. Klene, J. E. Knox, J. B. Cross, V. Bakken, C. Adamo, J. Jaramillo, R. Gomperts, R. E. Stratmann, O. Yazyev, A. J. Austin, R. Cammi, C. Pomelli, J. W. Ochterski, R. L. Martin, K. Morokuma, V. G. Zakrzewski, G. A. Voth, P. Salvador, J. J. Dannenberg, S. Dapprich, A. D. Daniels, O. Farkas, J. B. Foresman, J. V. Ortiz, J. Cioslowski, D. J. Fox, Gaussian, Inc., Wallingford CT, **2010**.
- 2 a) M. Ernzerhof, M. and G. E. Scuseria *J. Chem. Phys.* **1999**, *110*, 5029-5036; b) C. Adamo and V. Barone *J. Chem. Phys.* **1999**, *110*, 6158-69
- 3 a) P. J. Hay, W. R. Wadt, *J. Chem. Phys.* **1985**, *82*, 270; b) P. J. Hay, W. R. Wadt, *J. Chem. Phys.* **1985**, *82*, 284; c) P. J. Hay, W. R. Wadt, *J. Chem. Phys.* **1985**, *82*, 299.
- 4 N. Zhao, Y.-H. Wu, L.-X. Shi, Q.-P. Lin, Z.-N. Chen, *Dalton Trans.* **2010**, *39*, 8288.
- 5 Q. Zhao, C. Y. Jiang, M. Shi, F. Y. Li, T. Yi, Y. Cao, C. H. Huang, *Organometallics*, **2006**, *25*, 3631.
- 6 K. Nakamaru, *Bull. Chem. Soc. Jpn.* **1982**, *55*, 2697.
